# Supplementary material for: Development and validation of the Continuous Traumatic Stress Response scale (CTSR) among adults exposed to ongoing security threats
Source: PubMed Central journal article supplement (PMC8158953; doi:10.1371/journal.pone.0251724), 2021-05-27
Supplement: pone.0251724.s002.pdf [file pone.0251724.s002.pdf]

S2 Table. Descriptive statistics by exposure to continuous security threat

| <b>Demographics characteristic</b>    | <b>All<br/>(N=313)</b> | <b>CTS<br/>(N=138)</b> | <b>Non-CTS<br/>(N=175)</b> | <b>Test statistic</b> | <b>P</b> |
|---------------------------------------|------------------------|------------------------|----------------------------|-----------------------|----------|
| Age, mean (SD)                        | 41.1(13.0)             | 42.1(14.3)             | 39.7 (12.1)                | t=-2.41, df=299       | 0.010    |
| Female                                | 189(60.4%)             | 96(69.6%)              | 93(53.1%)                  | $\chi^2=8.94$ , df=1  | 0.001    |
| Married or cohabitating               | 231(73.8%)             | 93(67.4%)              | 138(78.8%)                 | $\chi^2=5.10$ , df=1  | 0.045    |
| Above average income                  | 104(33.3%)             | 36(26.1%)              | 68(38.8%)                  | $\chi^2=5.79$ , df=1  | 0.024    |
| Non-religious                         | 184(59.1%)             | 92(66.7%)              | 92(52.6%)                  | $\chi^2=7.54$ , df=1  | 0.006    |
| Academic education                    | 215(68.7%)             | 90(65.2%)              | 125(71.4%)                 | $\chi^2=1.47$ , df=1  | 0.220    |
| Israeli*                              | 257(82.1%)             | 103(74.6%)             | 154(88.0%)                 | $\chi^2=10.91$ , df=1 | 0.001    |
| Urban                                 | 152(48.6%)             | 52(37.7%)              | 100(57.1%)                 | $\chi^2=9.73$ , df=1  | 0.001    |
| <b>Trauma related characteristics</b> |                        |                        |                            |                       |          |
| Prior exposure to trauma              | 109(34.8%)             | 44(31.9%)              | 65(37.1%)                  | $\chi^2=0.96$ , df=1  | 0.350    |
| PTSD symptoms**                       | 93(29.7%)              | 37(26.8%)              | 56(32.0%)                  | $\chi^2=1.86$ , df=1  | 0.200    |

|                                 |            |            |            |                     |        |
|---------------------------------|------------|------------|------------|---------------------|--------|
| CTSR symptoms                   | 140(45.2%) | 67(48.6%)  | 73(42.4%)  | $\chi^2=1.15, df=1$ | 0.280  |
| Fear of events, mean (SD)       | 2.58(1.16) | 3.04(1.15) | 2.21(1.02) | $t=5.42, df=306$    | <0.001 |
| Likelihood of events, mean (SD) | 2.49(0.77) | 2.85(0.75) | 2.21(0.66) | $t=3.19, df=308$    | <0.001 |

---

\*Born in Israel or immigrated before 1990 \*\*Symptoms only, regardless of 'exposure to a traumatic event' as defined by Criteria A
