# Supplementary material for: Development and validation of the Continuous Traumatic Stress Response scale (CTSR) among adults exposed to ongoing security threats
Source: PubMed Central journal article supplement (PMC8158953; doi:10.1371/journal.pone.0251724), 2021-05-27
Supplement: pone.0251724.s003.pdf [file pone.0251724.s003.pdf]

**S3 Table. EFA results on 25 ongoing exposure to threat items (n=113)**

| Item*                                                       | Factor loadings |            |            |
|-------------------------------------------------------------|-----------------|------------|------------|
|                                                             | 1               | 2          | 3          |
| 1 I feel unmotivated                                        | <b>.85</b>      |            |            |
| 2 I feel mentally exhausted                                 | <b>.72</b>      |            |            |
| 7 I feel that no one understands me                         | <b>.70</b>      |            |            |
| 6 I find it hard to trust the people around me              | <b>.68</b>      |            |            |
| 4 I feel that my life has no meaning                        | <b>.51</b>      |            |            |
| 9 I have episodes of rage                                   |                 | <b>.86</b> |            |
| 5 I have difficulty controlling my emotions                 |                 | <b>.73</b> |            |
| 10 I feel betrayed                                          |                 | <b>.66</b> |            |
| 3 I feel that my life is in danger                          |                 |            | <b>.74</b> |
| 11 I feel that I cannot protect the people who depend on me |                 |            | <b>.68</b> |
| 8 I have intense feelings of fear or horror                 |                 |            | <b>.43</b> |
| Eigenvalues                                                 | 5.31            | 1.38       | 1.20       |
| % of variance                                               | 25.46           | 21.49      | 14.67      |
| Cronbach's alpha                                            | 0.864           | 0.820      | 0.743      |
| Factor mean (SD)                                            | 0.55(0.65)      | 0.42(0.63) | 0.34(0.53) |
| Range                                                       | 0-2.80          | 0-3.00     | 0-3.00     |

\*The English phrases presented in this table are the translation of the original Hebrew phrases  
1- *Exhaustion and detachment*; 2 - *Rage and betrayal*; 3 - *Fear and helplessness*
