# Supplementary material for: Development and validation of the Continuous Traumatic Stress Response scale (CTSR) among adults exposed to ongoing security threats
Source: PubMed Central journal article supplement (PMC8158953; doi:10.1371/journal.pone.0251724), 2021-05-27
Supplement: pone.0251724.s004.pdf [file pone.0251724.s004.pdf]

**S4 Table. CTSR predictors: Results of the final adjusted regression model**

| Predictor                   | High CTSR scores |         |           | -2LL*  |
|-----------------------------|------------------|---------|-----------|--------|
|                             | AOR (SE)         | P value | 95% CI    |        |
| <b>Step 1</b>               |                  |         |           | 365.11 |
| Age                         | 0.96(0.01)       | 0.003   | 0.94-0.99 |        |
| Gender                      |                  |         |           |        |
| Male                        | 1.00             |         |           |        |
| Female                      | 1.81(0.28)       | 0.03    | 1.05-3.14 |        |
| Religiosity                 |                  |         |           |        |
| Secular                     | 1.00             |         |           |        |
| Traditional                 | 1.39(0.36)       | 0.53    | 0.69-2.57 |        |
| Religious                   | 0.88(0.34)       | 0.66    | 0.45-1.69 |        |
| Family status               |                  |         |           |        |
| Married or cohabitating     | 1.00             |         |           |        |
| Single                      | 1.76(0.39)       | 0.14    | 0.82-3.79 |        |
| Divorced or widow           | 0.81(0.52)       | 0.67    | 0.30-2.18 |        |
| Income                      |                  |         |           |        |
| Average                     | 1.00             |         |           |        |
| Below average               | 1.22(0.33)       | 0.54    | 0.64-2.33 |        |
| Above average               | 0.78(0.33)       | 0.46    | 0.41-1.50 |        |
| Community type              |                  |         |           |        |
| Rural                       | 1.00             |         |           |        |
| Urban                       | 1.04(0.29)       | 0.89    | 0.59-1.82 |        |
| Past exposure to trauma     |                  |         |           |        |
| No                          | 1.00             |         |           |        |
| Yes                         | 1.71(0.28)       | 0.055   | 0.99-2.95 |        |
| Access to shelter           |                  |         |           |        |
| No                          | 1.00             |         |           |        |
| Yes                         | 0.80(0.40)       | 0.59    | 0.37-1.76 |        |
| Other safe area             | 0.65(0.47)       | 0.35    | 0.26-1.62 |        |
| Physical disability         |                  |         |           |        |
| No                          | 1.00             |         |           |        |
| Yes                         | 1.51(0.43)       | 0.33    | 0.66-3.46 |        |
| <b>Step 2</b>               |                  |         |           | 357.03 |
| Likelihood of future events | 1.11(0.04)       | 0.007   | 1.03-1.20 |        |
| <b>Step 3</b>               |                  |         |           | 356.90 |
| CTS                         |                  |         |           |        |
| Non-CTS                     | 1.00             |         |           |        |
| CTS                         | 0.89(0.31)       | 0.73    | 0.50-1.65 |        |

\*-2 Log likelihood
