# Supplementary material for: Development and validation of the Continuous Traumatic Stress Response scale (CTSR) among adults exposed to ongoing security threats
Source: PLOS journal article supplement (doi:10.1371/journal.pone.0251724), 2021-05-27
Supplement: S1 (10.1371/journal.pone.0251724.s001) [file journal.pone.0251724.s001]

**S1 Table. Distance from the Gaza Strip and time to secure shelter**

| Strip | Distance from the Gaza Strip (km) | Time to secure shelter (sec) |
|-------|-----------------------------------|------------------------------|
| 1     | 10                                | 15                           |
| 2     | 20                                | 30                           |
| 3     | 30                                | 45                           |
| 4     | 40                                | 60                           |
| 5     | 50                                | 75                           |
| 6     | 60                                | 90                           |

Please refer to: <https://image.slidesharecdn.com/mysummervacation-110402192554-phpapp02/95/shared-future-2010-idf-homefront-command-6-728.jpg?cb=1301773572>

for a map presenting time to secure shelter throughout Israel.
